# Supplementary material for: Dynamic magnetic crossover at the origin of the hidden-order in van der Waals antiferromagnet CrSBr
Source: PubMed Central journal article supplement (PMC9374657; doi:10.1038/s41467-022-32290-4), 2022-08-12
Supplement: 41467_2022_32290_MOESM1_ESM.pdf [file 41467_2022_32290_MOESM1_ESM.pdf]

# Supplementary Information:

## Dynamic Magnetic Crossover at the Origin of the Hidden-Order in van der Waals Antiferromagnet CrSBr

**Sara A. López-Paz<sup>1,2,\*</sup>, Zurab Guguchia<sup>3</sup>, Vladimir Y. Pomjakushin<sup>4</sup>, Catherine Witteveen<sup>1,2</sup>, Antonio Cervellino<sup>5</sup>, Hubertus Luetkens<sup>3</sup>, Nicola Casati<sup>4</sup>, Alberto F. Morpurgo<sup>2,6</sup>, and Fabian O. von Rohr<sup>2,\*</sup>**

<sup>1</sup>Department of Chemistry, University of Zurich, CH-8057, Switzerland

<sup>2</sup>Department of Quantum Matter Physics, University of Geneva, CH-1211 Geneva, Switzerland

<sup>3</sup>Laboratory for Muon Spin Spectroscopy, Paul Scherrer Institute, CH-5232 Villigen PSI, Switzerland <sup>4</sup>Laboratory for Neutron Scattering and Imaging, Paul Scherrer Institute, CH-5232 Villigen PSI, Switzerland <sup>5</sup>Laboratory for Synchrotron Radiation - Condensed Matter, Paul Scherrer Institut, CH-5232 Villigen, Switzerland <sup>6</sup>Department of Applied Physics, University of Geneva, CH-1211 Geneva, Switzerland

\*sara.lopezpaz@unige.ch and fabian.vonrohr@unige.ch

## Supplementary Note 1: Neutron powder diffraction experiments

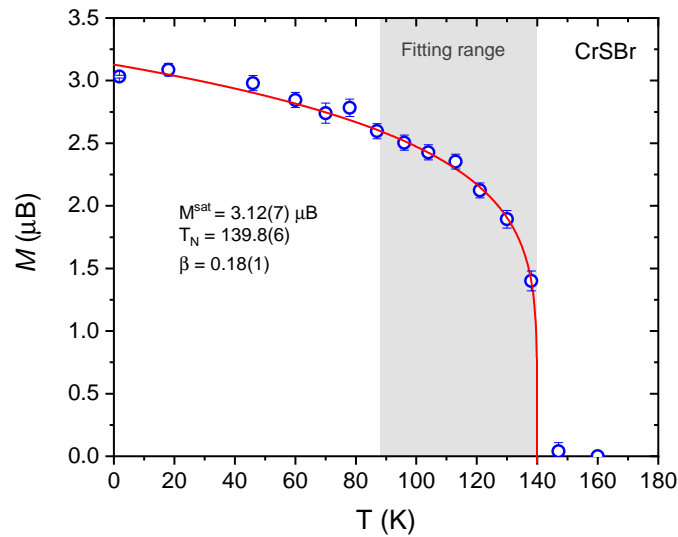

**Supplementary Figure 1.** Temperature dependence of the refined magnetic moment from the neutron diffraction data (blue circles). The fitting to a power law  $M \propto (T_c - T)^\beta$  is shown as a red continuous line, extrapolated to base temperature. The temperature region considered in the fitting is shown as a grey dashed area.

|      |                             | $T = 160$ K | $T = 1.8$ K |
|------|-----------------------------|-------------|-------------|
|      | $a$ (Å)                     | 3.5072(1)   | 3.5127(1)   |
|      | $b$ (Å)                     | 4.7492(2)   | 4.7458(1)   |
|      | $c$ (Å)                     | 7.9362(2)   | 7.9131(2)   |
|      | $V$ (Å <sup>3</sup> )       | 132.19(1)   | 131.92(1)   |
| Atom | Site                        |             |             |
| Cr   | $2b$ (0.25, 0.75, $z$ )     |             |             |
|      | $z$                         | -0.1251(7)  | -0.1269(6)  |
|      | $B_{iso}$ (Å <sup>3</sup> ) | 0.36(7)     | 0.22(6)     |
| S    | $2a$ (0.75, 0.75, $z$ )     |             |             |
|      | $z$                         | 0.0764(9)   | 0.0739(9)   |
|      | $B_{iso}$                   | 0.2(1)      | 0.21(9)     |
| Br   | $2a$ (0.75, 0.75, $z$ )     |             |             |
|      | $z$                         | -0.3511(6)  | -0.3535(6)  |
|      | $B_{iso}$                   | 0.66(5)     | 0.40(3)     |
|      | $R_p$                       | 4.02        | 4.38        |
|      | $R_{wp}$                    | 5.14        | 5.59        |
|      | $R_{Bragg}$                 | 3.90        | 3.48        |
|      | $\chi^2$                    | 1.44        | 1.71        |

**Supplementary Table 1.** Cell and structural parameters obtained from Rietveld refinements of the NPD data ( $\lambda = 2.449$  Å), at  $T = 160$  K and  $T = 1.8$  K for CrSBr, together with the agreement factors.

| <i>Symm.</i> | $x, y, z$ | $-x, y + 1/2, -z$ |
|--------------|-----------|-------------------|
| BASR         | 0 1 0     | 0 1 0             |
| BASI         | 0 0 0     | 0 0 0             |

**Supplementary Table 2.** Irreducible representation used for the refinement of the magnetic structure considering a single magnetic site at the Cr  $2b$  position (0.25, 0.75,  $z$ ).

## Supplementary Note 2: Magnetization measurements

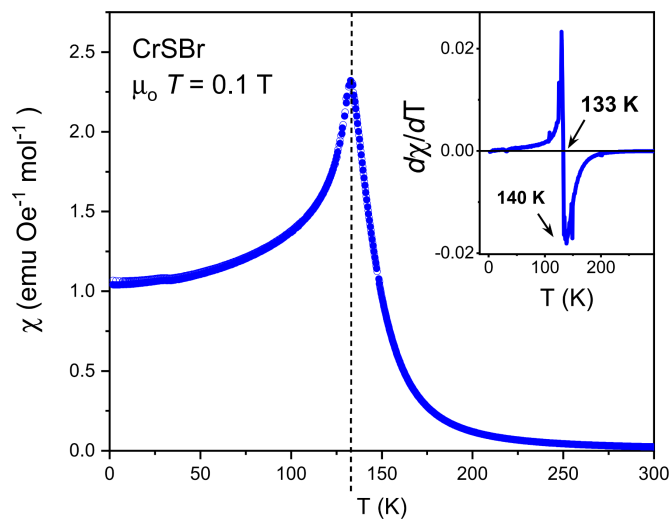

**Supplementary Figure 2.** Magnetic susceptibility for powder CrSBr under a 0.1 T magnetic field in zero field cooling (ZFC, filled circles) and field cooling (FC, empty circles) modes. Inset show the derivative of the ZFC curve.

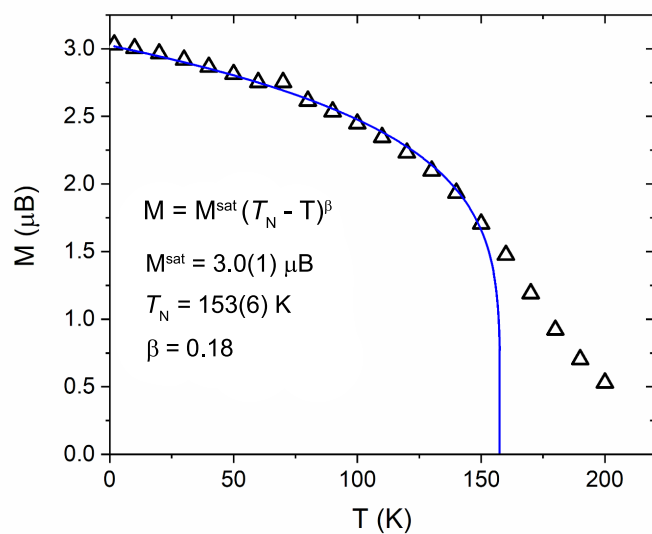

**Supplementary Figure 3.** Temperature dependence of the saturation magnetization  $M(3\text{T})$  –open triangles- and fitting to a power law  $M \propto (T_c - T)^\beta$  with a fixed critical exponent of  $\beta = 0.18$  as derived from the neutron diffraction data in the 1.8 K-200 K temperature range.

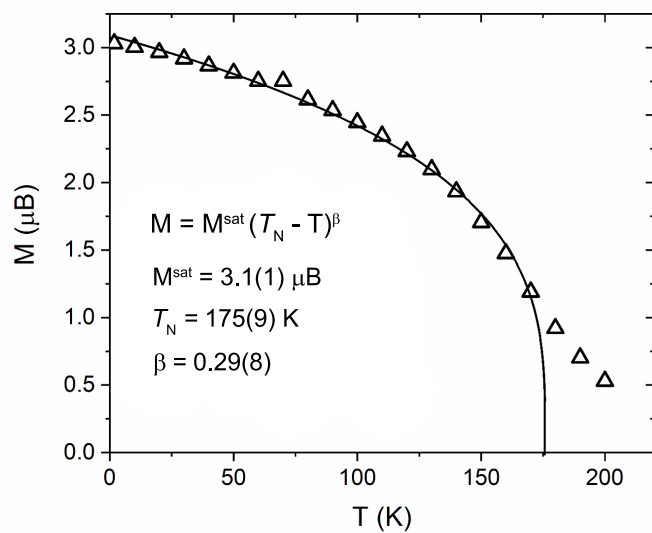

**Supplementary Figure 4.** Temperature dependence of the saturation magnetization  $M(3\text{T})$  –open triangles- and free fitting to a power law in the 1.8 K- 200 K temperature range.

### Supplementary Note 3: Synchrotron X-ray diffraction measurements

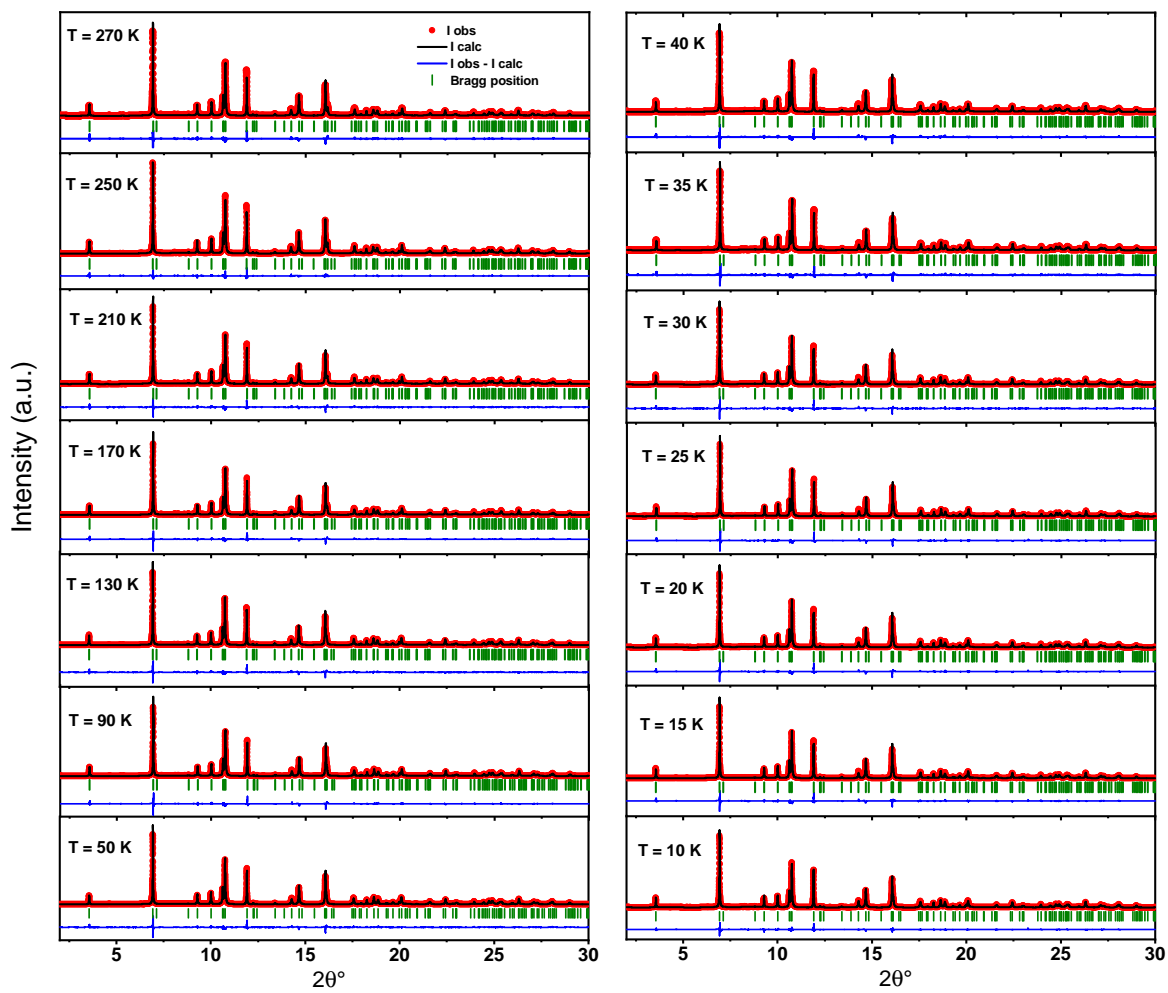

**Supplementary Figure 5.** Rietveld refinement of the SXRD data ( $\lambda = 0.492 \text{ \AA}$ ) at different temperatures for CrSBr within the *Pmm* space group.

| $T$ (K) | $a$ (Å)    | $b$ (Å)    | $c$ (Å)   | $V$ (Å <sup>3</sup> ) | $R_p$ | $R_{wp}$ | $R_{Bragg}$ |
|---------|------------|------------|-----------|-----------------------|-------|----------|-------------|
| 270     | 3.50440(4) | 4.75927(5) | 7.9546(1) | 132.67(1)             | 5.30  | 7.59     | 5.21        |
| 250     | 3.50439(4) | 4.75787(5) | 7.9511(1) | 132.57(1)             | 5.22  | 7.43     | 4.75        |
| 210     | 3.50521(4) | 4.75502(5) | 7.9448(1) | 132.41(1)             | 5.18  | 7.32     | 4.62        |
| 170     | 3.50686(4) | 4.75160(5) | 7.9396(5) | 132.30(1)             | 6.00  | 7.91     | 5.23        |
| 130     | 3.50901(4) | 4.74839(4) | 7.9343(1) | 132.20(1)             | 5.78  | 7.84     | 4.42        |
| 90      | 3.50974(4) | 4.74603(5) | 7.9260(1) | 132.02(1)             | 8.75  | 12.2     | 8.01        |
| 50      | 3.51036(4) | 4.74594(5) | 7.9200(1) | 131.94(1)             | 5.65  | 7.70     | 4.21        |
| 40      | 3.51030(4) | 4.74584(5) | 7.9187(1) | 131.92(1)             | 5.83  | 7.87     | 4.48        |
| 36      | 3.51031(4) | 4.74584(5) | 7.9182(1) | 131.91(1)             | 5.89  | 7.90     | 4.45        |
| 30      | 3.51029(4) | 4.74583(5) | 7.9175(1) | 131.90(1)             | 6.18  | 8.15     | 5.03        |
| 25      | 3.51028(4) | 4.74581(5) | 7.9172(1) | 131.89(1)             | 6.14  | 8.13     | 4.76        |
| 20      | 3.51026(4) | 4.74581(5) | 7.9168(5) | 131.88(1)             | 6.11  | 8.12     | 5.02        |
| 15      | 3.51025(4) | 4.74581(5) | 7.9165(1) | 131.88(1)             | 6.05  | 8.01     | 4.86        |
| 10      | 3.51023(5) | 4.74575(6) | 7.9164(1) | 131.87(1)             | 6.65  | 8.57     | 6.95        |

**Supplementary Table 3.** Cell parameters and cell volume obtained from Rietveld refinement of the SXRD data for CrSBr at different temperatures, together with the agreement factors.

### Supplementary Note 4: $\mu$ SR experiment and analysis

Zero field and weak transverse field (30 G)  $\mu$ SR spectra were acquired at the GPS ( $\pi$ M3 beamline) instrument at the Paul Scherrer Institute, allowing essentially a background free  $\mu$ SR measurement at ambient conditions. The sample was mounted in a He gas-flow cryostat and the temperature was varied between 5 and 200 K.

#### Analysis of weak TF- $\mu$ SR data.

The weak TF asymmetry spectra were analyzed using the following function:

$$A^{TF}(t) = A_0 \cdot \exp(-\lambda t) \cdot \cos(\omega t + \phi)$$

Eq.1

Where  $t$  is the time after muon implantation,  $A(t)$  is the time-dependent asymmetry,  $A_0$  is the amplitude of the oscillating component and  $\lambda$  is the exponential damping rate due to paramagnetic spin fluctuations and/or nuclear dipolar moments.  $\omega = 2\pi\nu\mu$  is the Larmor precession frequency set by the strength of the transverse magnetic field, and  $\phi$  is a phase offset. The magnetically ordered volume fraction at each temperature was calculated from the refined amplitude  $A(T)_0$  as

$$V_M = 1 - A_0(T)/A_0(T_{max})$$

Eq.2

Where  $A_0(T_{max})$  is the amplitude in the paramagnetic phase at high temperature.

#### Analysis of ZF- $\mu$ SR data.

The ZF spectra in the paramagnetic state ( $130 \text{ K} < T < 200 \text{ K}$ ) were fitted using a single exponential function of the form:

$$A^{ZF}(t) = A_0 \cdot \exp(-\lambda_{pm}t)$$

Eq.3

The ZF spectra in the  $5 \text{ K} < T < 130 \text{ K}$  temperature range were fitted using the following function:

$$A^{ZF}(t) = A_0 \cdot f_{osc} \cdot \cos(\gamma_\mu B_\mu t + \phi) \cdot \exp(-\lambda_1 t) + A_0 \cdot f_L \cdot \exp(-\lambda_2 t)$$

Eq.4

The first and second terms describe the oscillating component ( $f_{osc}$ ) and the slowly relaxing longitudinal component ( $f_L$ ), respectively. The longitudinal component arises due to muons experiencing local field components which are parallel to the initial muon spin polarization.  $\lambda_1$  and  $\lambda_2$  are the oscillating and non-oscillating relaxation rates, respectively.  $B_\mu$  is the internal magnetic field at the muon site and  $\gamma_\mu = 135.5 \text{ MHz/T}$  is the muon gyromagnetic ratio.

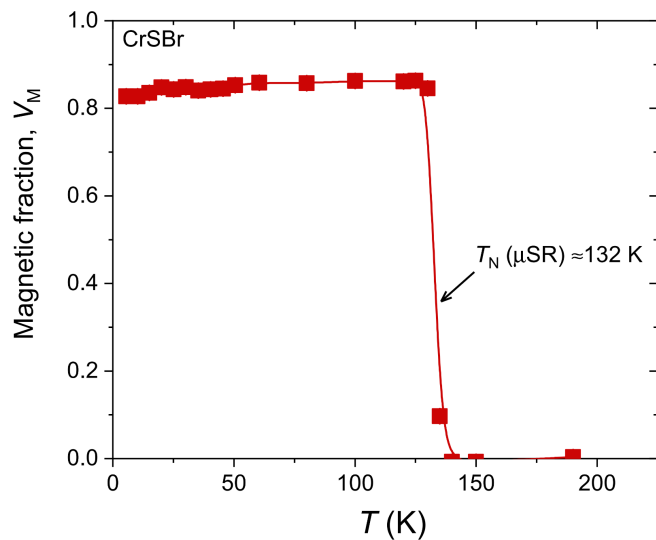

**Supplementary Figure 6.** Magnetic volume fraction as a function of temperature for CrSBr as derived from the weak TF- $\mu$ SR measurements.

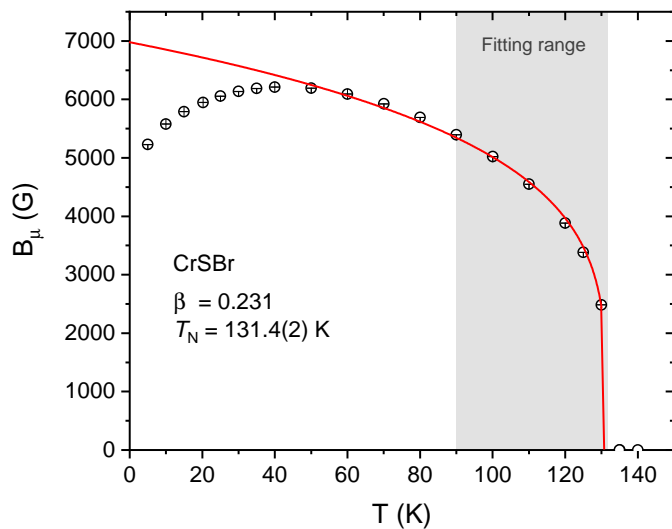

**Supplementary Figure 7.** Temperature dependence of the internal magnetic field as derived from the ZF- $\mu$ SR data (black circles). The fitting to a power law  $M \propto (T_c - T)^\beta$  using a fixed exponent of  $\beta = 0.231$  according to the 2DXY model is shown as a red continuous line, extrapolated to base temperature. The temperature region considered in the fitting is shown as a grey dashed area.
